# Supplementary material
Source: Springer Nature journal article supplement (https://www.springermedizin.de/resource/supplementary/12984_2011_370_MOESM6_ESM.pdf/9605906)

COP response

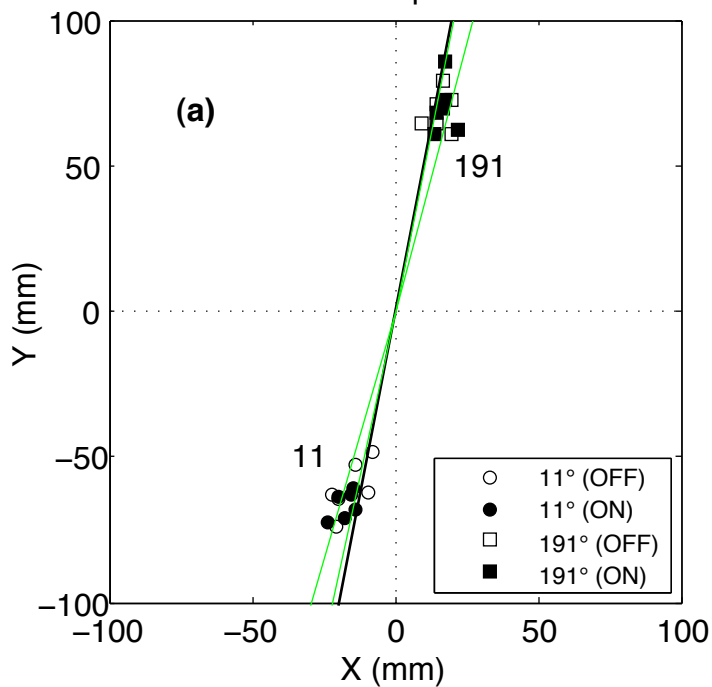

COP response

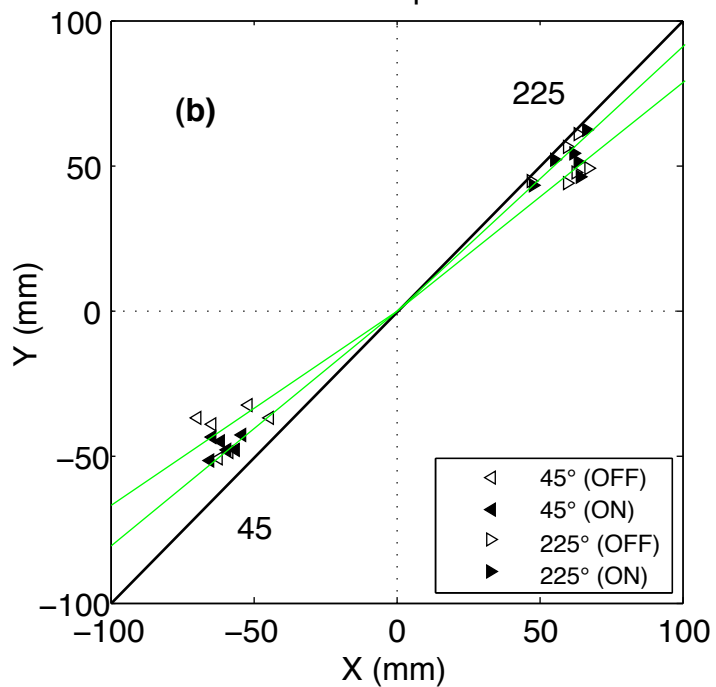

Tilt response

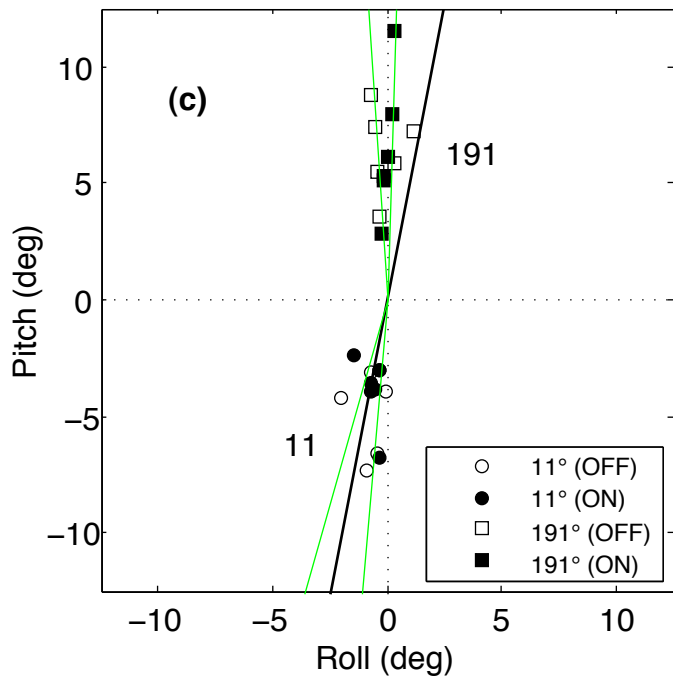

Tilt response

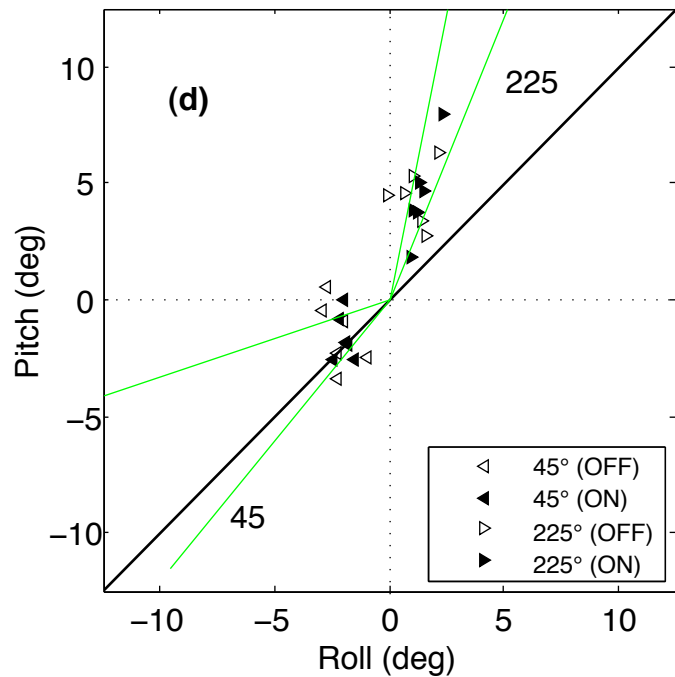

Supplement: MOESM6 [file 9605906]
